# Supplementary material for: LGBTQ+ curriculum content and delivery in PT education: A mixed-methods study
Source: Research Square preprint supplement (doi:10.21203/rs.3.rs-8723512/v1), 2026-02-16
Supplement: Supplementary file 1 [file 8f5aa1f19caade9034403358.docx]

**Title:** LGBTQ+ Curriculum content and delivery in PT education: A mixed-methods study

**Journal:** Advances in Health Sciences Education

**Authors:** Christine A. Cabelka, PT, PhD and Samantha Mohn-Johnsen, PT, DPT, EdD

**Affiliations:** Department of Physical Therapy, The College of St. Scholastica, Duluth, MN

**Corresponding Author:** smohnjohnsen@css.edu

**Online Resource 2.** Table of curricular design elements included in PT education.

| **Curricular Design** | **n (%)** |
| --- | --- |
| *Which of the following options BEST describes the format in which LGBTQ+ health concepts are included in your curriculum? (n=60)* |  |
| One unit in one course | 17 (28.3%) |
| Integrated throughout the curriculum | 16 (26.7%) |
| Stand-alone course | 1 (1.67%) |
| Distributed between courses | 19 (31.7%) |
| Other (optional seminar, clinic discussion, in courses taught for another program not PT) | 7 (11.7%) |
| *Which of the following delivery methods is used for LGBTQ+ health topics? (n=62)* |  |
| Asynchronous | 3 (4.84%) |
| Synchronous | 4 (6.45%) |
| Traditional face to face | 46 (74.2%) |
| Flipped | 6 (9.68%) |
| Other | 3 (4.84%) |
| *Which of the following instructional methods are used for content related to LGBTQ+ curriculum? (Select all that apply) (n=192)* |  |
| Lecture | 46 (24.0%) |
| Case scenarios | 38 (19.8%) |
| Role play | 7 (3.65%) |
| Guest speaker or guest panel | 29 (15.1%) |
| Service learning | 4 (2.08%) |
| Direct clinical services | 10 (5.21%) |
| Discussion | 46 (24.0%) |
| Independent learning modules | 10 (5.21%) |
| Other (research assignment) | 2 (1.04%) |
