# Supplementary material for: LGBTQ+ curriculum content and delivery in PT education: A mixed-methods study
Source: Research Square preprint supplement (doi:10.21203/rs.3.rs-8723512/v1), 2026-02-16
Supplement: Supplementary file 2 [file fe71fa8cdf3594ee94df414d.docx]

**Title:** LGBTQ+ Curriculum content and delivery in PT education: A mixed-methods study

**Journal:** Advances in Health Sciences Education

**Authors:** Christine A. Cabelka, PT, PhD and Samantha Mohn-Johnsen, PT, DPT, EdD

**Affiliations:** Department of Physical Therapy, The College of St. Scholastica, Duluth, MN

**Corresponding Author:** smohnjohnsen@css.edu

**Online Resource 1.** Table of unique population language and terminology topics included in PT education.

| **Unique Population Language, Terminology, and Health Needs** | **n (%)** |
| --- | --- |
| *Do you include use of legal and preferred names? (n=71)* |  |
| Yes | 66 (93.0%) |
| No | 5 (7.04%) |
| *Do You Teach About Inappropriate or Offensive Language? (n=68)* |  |
| Yes | 60 (88.2%) |
| No | 8 (11.8%) |
| *Do You Teach About Use of Neutral or Non-Gendered Language? (n=68)* |  |
| Yes | 53 (77.9%) |
| No | 15 (22.1%) |
| *Do You Discuss Best Practice Related to Documentation? (n=64)* |  |
| Yes | 46 (71.9%) |
| No | 18 (28.1%) |
| *Do You Discuss the Topic of Deadnaming? (n=71)* |  |
| Yes | 26 (36.6%) |
| No | 45 (63.3%) |
| *Do You Teach About Intersex? (n=67)* |  |
| Yes | 32 (47.8%) |
| No | 35 (52.2%) |
| *Do you Teach About Community Ownership of Language? (n=68)* |  |
| Yes | 28 (41.2%) |
| No | 40 (58.8%) |
| *Do You Teach About Using Patient Preferred Anatomy Language? (n=68)* |  |
| Yes | 32 (47.1%) |
| No | 36 (52.9%) |
| *Do you provide education regarding different needs of the LGBTQ+ population at different points across the lifespan? (n=66)* |  |
| Yes | 29 (43.9%) |
| No | 37 (56.1%) |
| *Do you provide education related to policies that include/exclude or otherwise limit access to health care? (n=65)* |  |
| Yes | 34 (52.3%) |
| No | 31 (47.7%) |
| *Do you provide education about non-surgical practices (e.g. tucking, binding, packing, etc)? (n=66)* |  |
| Yes | 21 (31.8%) |
| No | 45 (68.2%) |
| *Do you cover surgical management related to gender confirmation? (n=65)* |  |
| Yes | 26 (40%) |
| No | 39 (60%) |
